# Supplementary material for: Sperm motility in mice with oligo-astheno-teratozoospermia restored by in vivo injection and electroporation of naked mRNA
Source: eLife journal article supplement (doi:10.7554/elife.94514), 2024-02-28

Figure 12-supplement 2 , Source Data 1. Original membranes corresponding to Figure 12-supplement 2, panel D. The lane corresponds to ARMC2 protein

- 1. Protein Ladder
- 2. HEK + *Armc2*-mRNA
- 3. HEK + *Armc2*-EEV
- 4. HEK NT

KDa  
250  
150  
100  
75

$\alpha$ -HA  
(merged HA and PM)

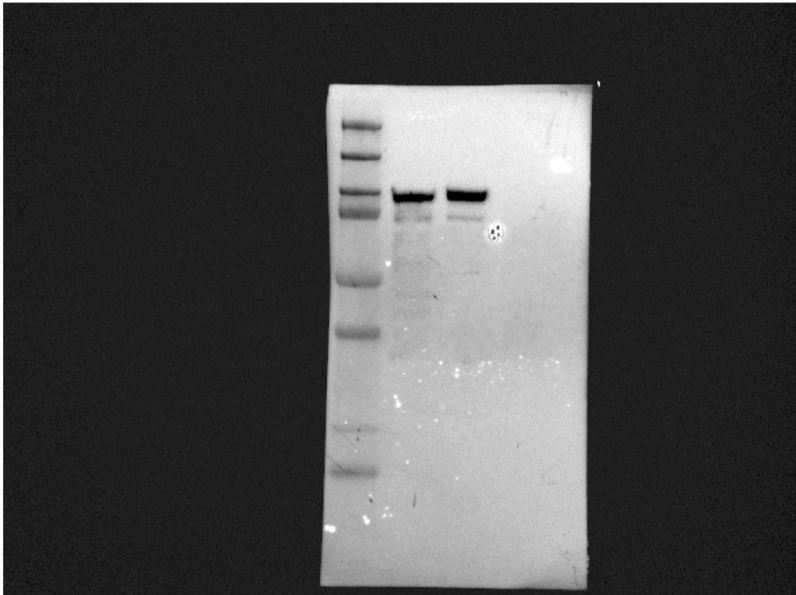

1 2 3 4

Colorimetric

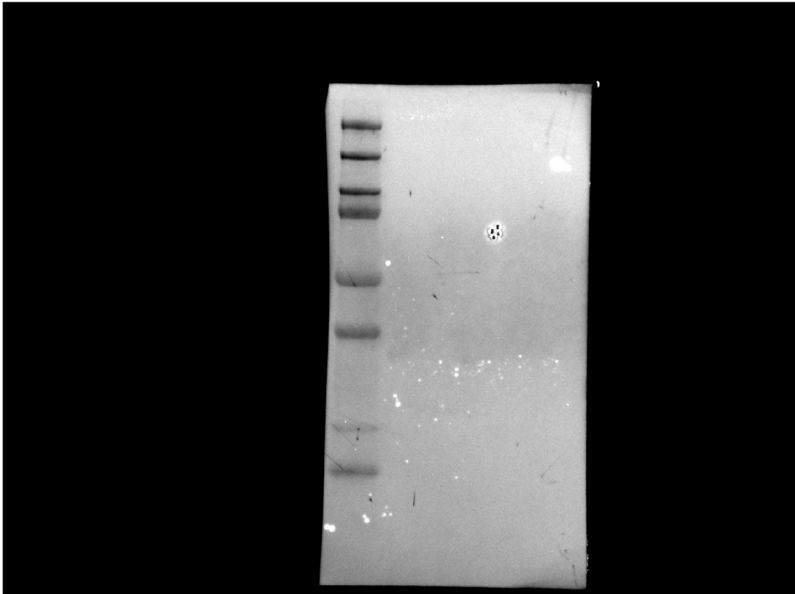

1 2 3 4

$\alpha$ -HA

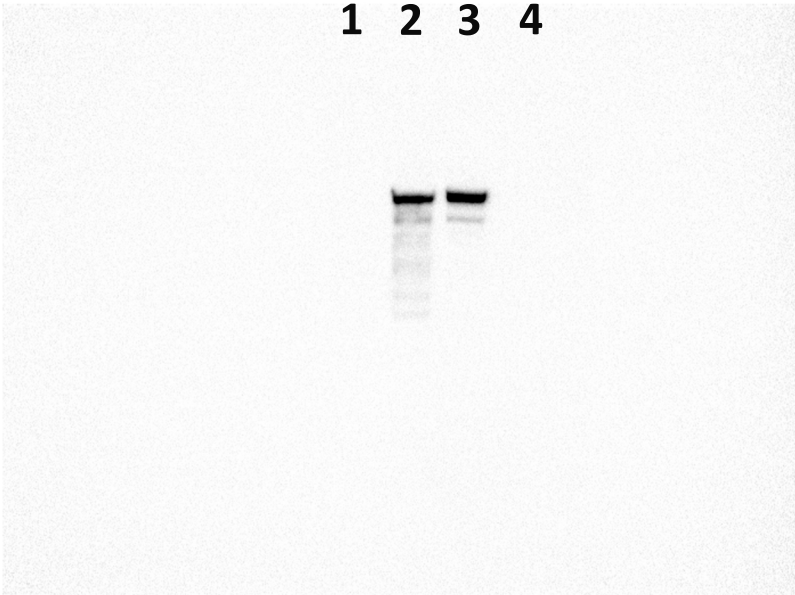

Supplement: fig12-figsupp1-data1 [file Figure_12XXXfigure_supplement_1-source_data_1.pdf › Figure_12XXXfigure_supplement_1-source_data_1.pdf]
